# Supplementary material
Source: HighWire-hosted journal article supplement (http://www.cmajopen.ca/highwire/filestream/81306/field_highwire_adjunct_files/0/2019-0215-1-at.pdf)
Supplement: 2019-0215-1-at.pdf [file 2019-0215-1-at.pdf]

## Appendix 1 (as supplied by the authors): Interview guide/Guide d'entrevue

Thank you for agreeing to do an interview with us today.

The purpose of these interviews with health care providers across the country is to help us better understand the reasons you do or do not discuss, recommend, or administer vaccines in your practice.

As a reminder, we will be audio-recording this interview. We will keep your personal information strictly confidential, and you will have the opportunity to review the transcript for accuracy and privacy issues.

You can skip any question you do not wish to answer, for any reason.

Do you have any questions for me before we begin?

1. Please tell me a little about your clinical practice. Where and how do you practice, and what are your patients/clients like?

Possible probes:

- a. How and why did you end up doing what you do?
- b. Have you always worked there, or did you begin in a different setting?
- c. Do you have an overarching philosophy or goal for your patient care?

2. How do you do to keep up-to-date with guidelines and recommendations on clinical topics or new therapies?

Possible probes:

- a. Do you have the kind of time and support you need to find and integrate new evidence into your practice?
- b. Do you feel like you have the skills you need?
- c. Do you and colleagues share new evidence with each other? How?
- d. What kind of education, if any, do you have in critical appraisal of research, or in epidemiology?
- e. How well do you feel your training in use of medical evidence prepared you for actual clinical work?

3. What are your thoughts about Canada's infant vaccinations?

Possible probes:

- a. How safe do you think they are?
- b. How effective do you think they are?
- c. What do you think about the recommended schedule?

4. What are your thoughts about vaccinations in pregnancy?

Possible probes:

- a. What special considerations do you take into account with pregnant patients/clients in particular?
- b. Are there particular vaccines you have any concerns about in pregnancy?
- c. Are there any particular vaccines that you wish existed or could be given in pregnancy?

5. Do you think your beliefs about vaccines are shared by a majority of colleagues in your discipline? Why or why not?

6. Do you recall any clinical training that attempted provided with information on immunization? How about any continuing professional education?

Possible probes:

- a. What did you think of them? How effective was it? What do you remember about it?
- b. Is there any type of training or support you would like, or that you think others in your profession would benefit from?

7. Do you routinely discuss vaccines with your patients/clients? This could be about vaccines in pregnancy, vaccines to get before or after pregnancy, or the infant vaccination schedule.

Possible probes:

- a. What vaccines do you discuss?
  - b. How does it come up? Do you bring it up or do they? Do you have any clinical reminder systems for vaccination?
  - c. How frequently does this happen? Always? Usually? Occasionally?
  - d. What do you touch on in these conversations?
- 
8. Do you regularly make recommendations or express a strong opinion for or against vaccines with your patients/clients? This could be about vaccines in pregnancy, vaccines to get before or after pregnancy, or the infant vaccination schedule.

Possible probes:

- a. If YES: About which ones? How does this go? What do you say to them? Can pretend I'm a patient and give an example of what you might say?
  - b. If NO: Why do you refrain from making recommendations? (e.g., have no strong opinion, don't want to alienate patients, model of care)
- 
9. Do you regularly provide any vaccines to clients in your practice or clinic?

Possible probes:

- a. If YES: Which ones? How did you decide to provide that/those?
  - b. If YES: Who administers them? How do you manage the logistics? Are there any challenges?
  - c. If NO: Why not?
  - d. In NO: Is there anything that could change that would encourage you to provide vaccines? (e.g., better evidence on effectiveness or safety, easier to purchase or bill for vaccines, more time in patient interactions, etc.)
- 
10. What, if anything, do you think would make it more likely that a majority of your colleagues would recommend or offer vaccination in their clinical practice?

11. Are there other thoughts you would like to share about your clinical practice, your training, and your views on vaccination?

Thank you for your time and expertise! We will be in touch with your thank-you honorarium, and later on to invite you to review your interview transcript.

Merci d'avoir accepté de participer à une entrevue individuelle avec nous aujourd'hui.

Le but des entrevues que nous menons actuellement auprès de professionnels de la santé qui font des suivis de grossesse à travers le pays est de nous aider à mieux comprendre les raisons pour lesquelles vous discutez (ou non), vous recommandez (ou non) et vous administrez (ou non) des vaccins dans le cadre de votre pratique.

Je tiens à vous rappeler que cette entrevue sera enregistrée. Vos informations personnelles seront conservées de façon confidentielle et vous aurez la possibilité de relire la transcription de votre entrevue afin d'en vérifier l'exactitude et d'y apporter des corrections s'il y a lieu.

Durant l'entrevue, vous pouvez également choisir de ne pas répondre à une question si vous le souhaitez.

Avez-vous des questions avant de débiter l'entrevue?

1. Tout d'abord, j'aimerais que vous me parliez un peu de votre pratique clinique. À quel endroit pratiquez-vous? Quel est votre type de pratique? Décrivez-moi votre clientèle.

Sous-questions:

- d. Comment et pourquoi avez-vous choisi de faire ce que vous faites?
- e. Avez-vous toujours travaillé à [cet endroit] ou bien votre parcours vous-a-t-il amené à travailler ailleurs?
- f. Avez-vous une philosophie particulière ou un objectif lorsque vous offrez des soins à vos patients/clients?

2. De quelle façon/Par quels moyens vous gardez-vous à jour en ce qui concerne les lignes directrices et les recommandations sur des sujets liés à votre pratique clinique ou sur de nouveaux traitements?

Sous-questions:

- a. Avez-vous le temps et le soutien nécessaire pour être au courant et pour intégrer de nouvelles évidences/informations dans votre pratique?
- b. Sentez-vous que vous avez les habiletés nécessaires pour le faire?
- c. Vous arrive-t-il de partager entre collègues de nouvelles évidences/informations? Si oui, comment?
- d. Avez-vous reçu de la formation en lien avec la recherche ou l'épidémiologie?
- e. Estimez-vous que votre formation académique vous a bien préparé(e) pour utiliser les évidences médicales dans votre pratique clinique?

3. Que pensez-vous de la vaccination infantile au Canada?

Sous-questions:

- a. À quel point considérez-vous que les vaccins administrés/recommandés aux enfants sont sécuritaires?
- b. À quel point considérez-vous que les vaccins administrés/recommandés aux enfants sont efficaces?
- c. Que pensez-vous du calendrier vaccinal qui est recommandé?

4. Que pensez-vous de la vaccination durant la grossesse?

Sous-questions:

- a. Prenez-vous des dispositions spéciales avec les patientes enceintes?
- b. Avez-vous des inquiétudes face à certains vaccins en particulier durant la grossesse?
- c. Y a-t-il certains vaccins que vous aimeriez qui existent ou qui puissent être administrés durant la grossesse?

5. Croyez-vous qu'une majorité de vos collègues exerçant dans votre discipline partage vos opinions au sujet des vaccins? Si oui, pourquoi? Si non, pourquoi?

6. Vous souvenez-vous d'avoir assisté à ou d'avoir suivi une formation clinique au cours de laquelle des informations sur la vaccination vous ont été données? Et qu'en est-il pour les formations médicales continues auxquelles vous auriez-pu assister?

Sous-questions:

- a. Qu'en avez-vous pensé? Avez-vous trouvé cela utile? Que vous souvenez-vous de cette formation/ces formations?
- b. Est-ce qu'il existe une formation ou un type de soutien que vous aimeriez avoir ou qui, selon vous, serait utile pour des professionnels comme vous?

7. Discutez-vous de façon régulière de la vaccination avec vos patient(e)s/client(e)s? Cela peut être autant au sujet de la vaccination durant la grossesse, que de la vaccination avant ou après la grossesse ou bien du calendrier vaccinal de l'enfant.

Sous-questions:

- a. De quel(s) vaccin(s) discutez-vous?
- b. De quelle(s) façon(s) le sujet est-il abordé? Abordez-vous le sujet en premier ou vos patient(e)s/client(e)s vous parlent-elles de la vaccination d'emblée?
- c. À quelle fréquence cela arrive-t-il? Toujours? Souvent? Occasionnellement?
- d. Qu'abordez-vous généralement lors de ces discussions?

8. Dans le cadre de votre pratique, recommandez-vous souvent ou vous exprimez-vous souvent en faveur ou en défaveur de la vaccination? Cela peut être autant au sujet de la vaccination durant la grossesse, que de la vaccination avant ou après la grossesse ou bien du calendrier vaccinal de l'enfant.

Sous-questions:

- a. Si OUI : Au sujet de quel(s) vaccin(s)? Comment ces discussions se passent-elles? Que dites-vous à vos patient(e)s? Vous pouvez faire semblant que je suis un(e) de vos patient(e)s pour me donner un exemple de ce que vous pourriez dire.
- c. Si NON : Pour quelle(s) raison(s) ne faites-vous pas de recommandations? (par exemple : aucune opinion particulière sur la vaccination, ne veut pas frustrer/déranger ses patientes, modèle de soins existant)

9. Dans votre pratique ou votre clinique, est-ce que des vaccins sont régulièrement administrés aux patient(e)s/client(e)s?

Sous-questions:

- a. Si OUI : Lesquels? Comment s'est prise la décision d'offrir ces vaccins?
- b. Si OUI : Qui administrent les vaccins? De quelle façon la vaccination est-elle offerte? (Parlez-moi un peu de la logistique entourant l'administration des vaccins?) Est-ce que vous rencontrez des défis particuliers?
- c. Si NON : Pourquoi?
- d. Si NON : Qu'est-ce qui pourrait vous encourager à offrir la vaccination dans votre milieu de pratique/clinique? (par exemple, davantage de preuves entourant l'efficacité ou la sécurité des vaccins, plus grande facilité pour l'achat et la facturation, plus de temps avec les patient(e)s durant les rendez-vous, etc.)

10. Selon vous, qu'est-ce qui ferait en sorte que la majorité de vos collègues recommande ou offre la vaccination dans leur pratique clinique?

11. Est-ce que vous aimeriez ajouter autre chose sur votre pratique clinique, votre formation ou vos perceptions de la vaccination avant que l'on termine l'entrevue?

Merci beaucoup pour votre temps et votre expertise! Nous vous recontacterons sous peu au sujet de la compensation financière pour le temps que vous avez accordé à cette entrevue ainsi que pour la relecture de la transcription de votre entrevue.
